# Supplementary material for: In silicoprediction and interaction of resveratrol on methyl-CpG binding proteins by molecular docking and MD simulations study
Source: Royal Society of Chemistry journal article supplement (doi:10.1039/d2ra00432a), 2022-01-01
Supplement: d2ra00432a1.pdf [file d2ra00432a1.pdf]

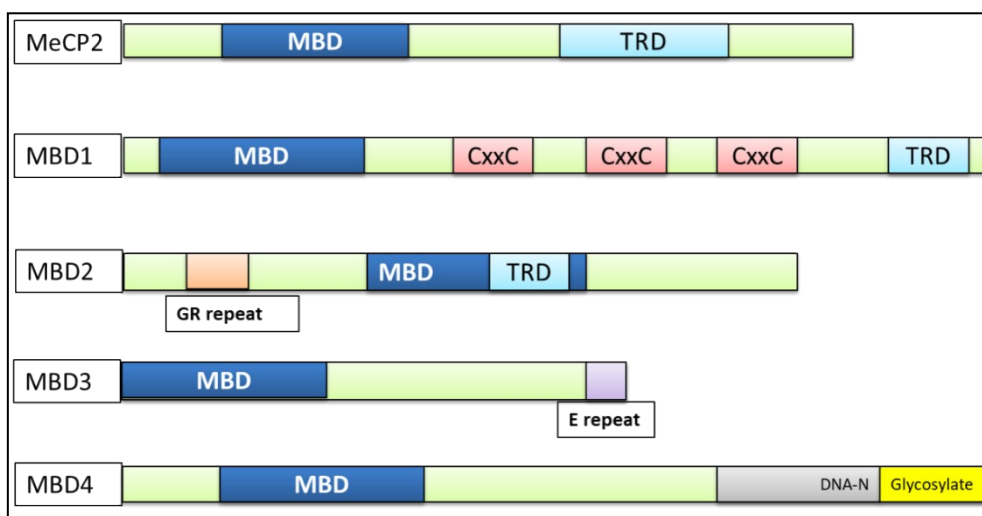

**Figure-S1:** -The structures similarity of MBD protein sequence from three different MBD proteins contains MBD motif which is methyl binding domain, TRD and CxxC region etc. which interact to the DNA sequence.

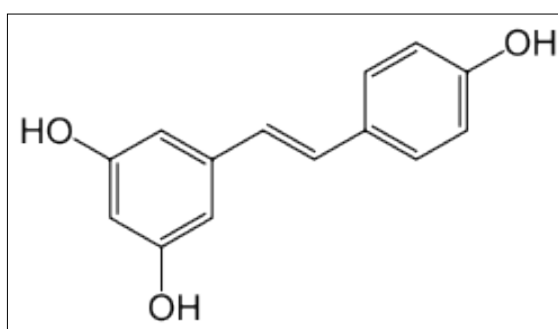

**Figure-S2A:** – Chemical Structure of Resveratrol

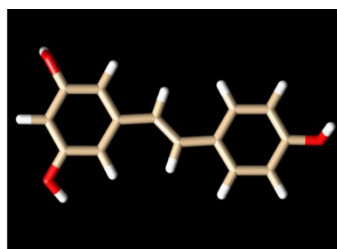

Resveratrol (Pubchem CID: 445154)

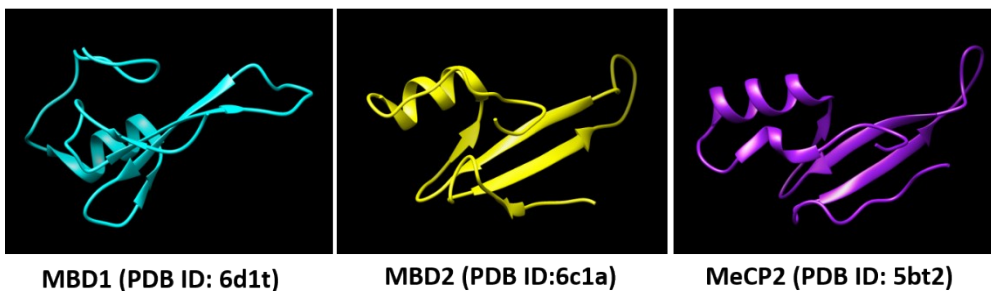

**Figure-S2B:** Structure analysis of MBD1, MBD2, MeCP2 and Reseveratrol retrived from PDB and pubchem. Three dimensional structure of MBD1, MBD2 and MeCP2 are shown in cyan color, yellow color and purple color cartoon respectively.

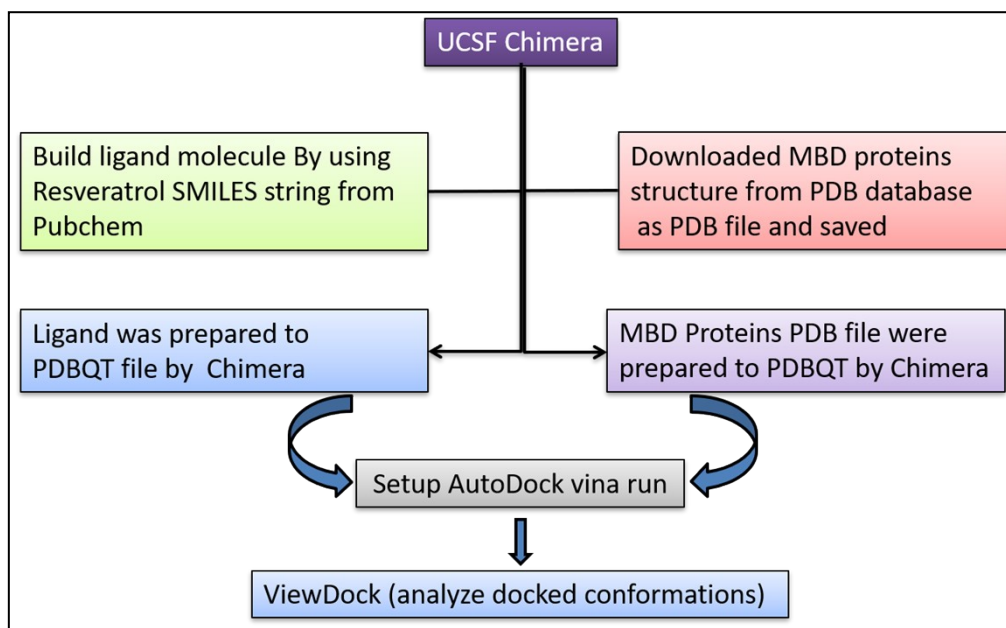

**Figure-S3:-** Flowchart for Docking analysis using Chimera and AutoDock vina.
